# Supplementary material
Source: publisher figshare collection journal article supplement (https://brill.figshare.com/ndownloader/files/22664939)
Supplement: Supplementary file 1 [file 22664939]

*Art & Perception*

**Frans van Mieris's Painting Technique as One of the Possible Sources for Willem Beurs's  
Treatise on Painting**

**Carol Pottasch\***

Mauritshuis, PO Box 536, 2501 CM, Den Haag, The Netherlands

Received 30 September 2019; accepted 9 May 2020

\* E-mail: [C.pottasch@mauritshuis.nl](mailto:C.pottasch@mauritshuis.nl)

**Supplementary material**

**Image for Frans van Mieris**

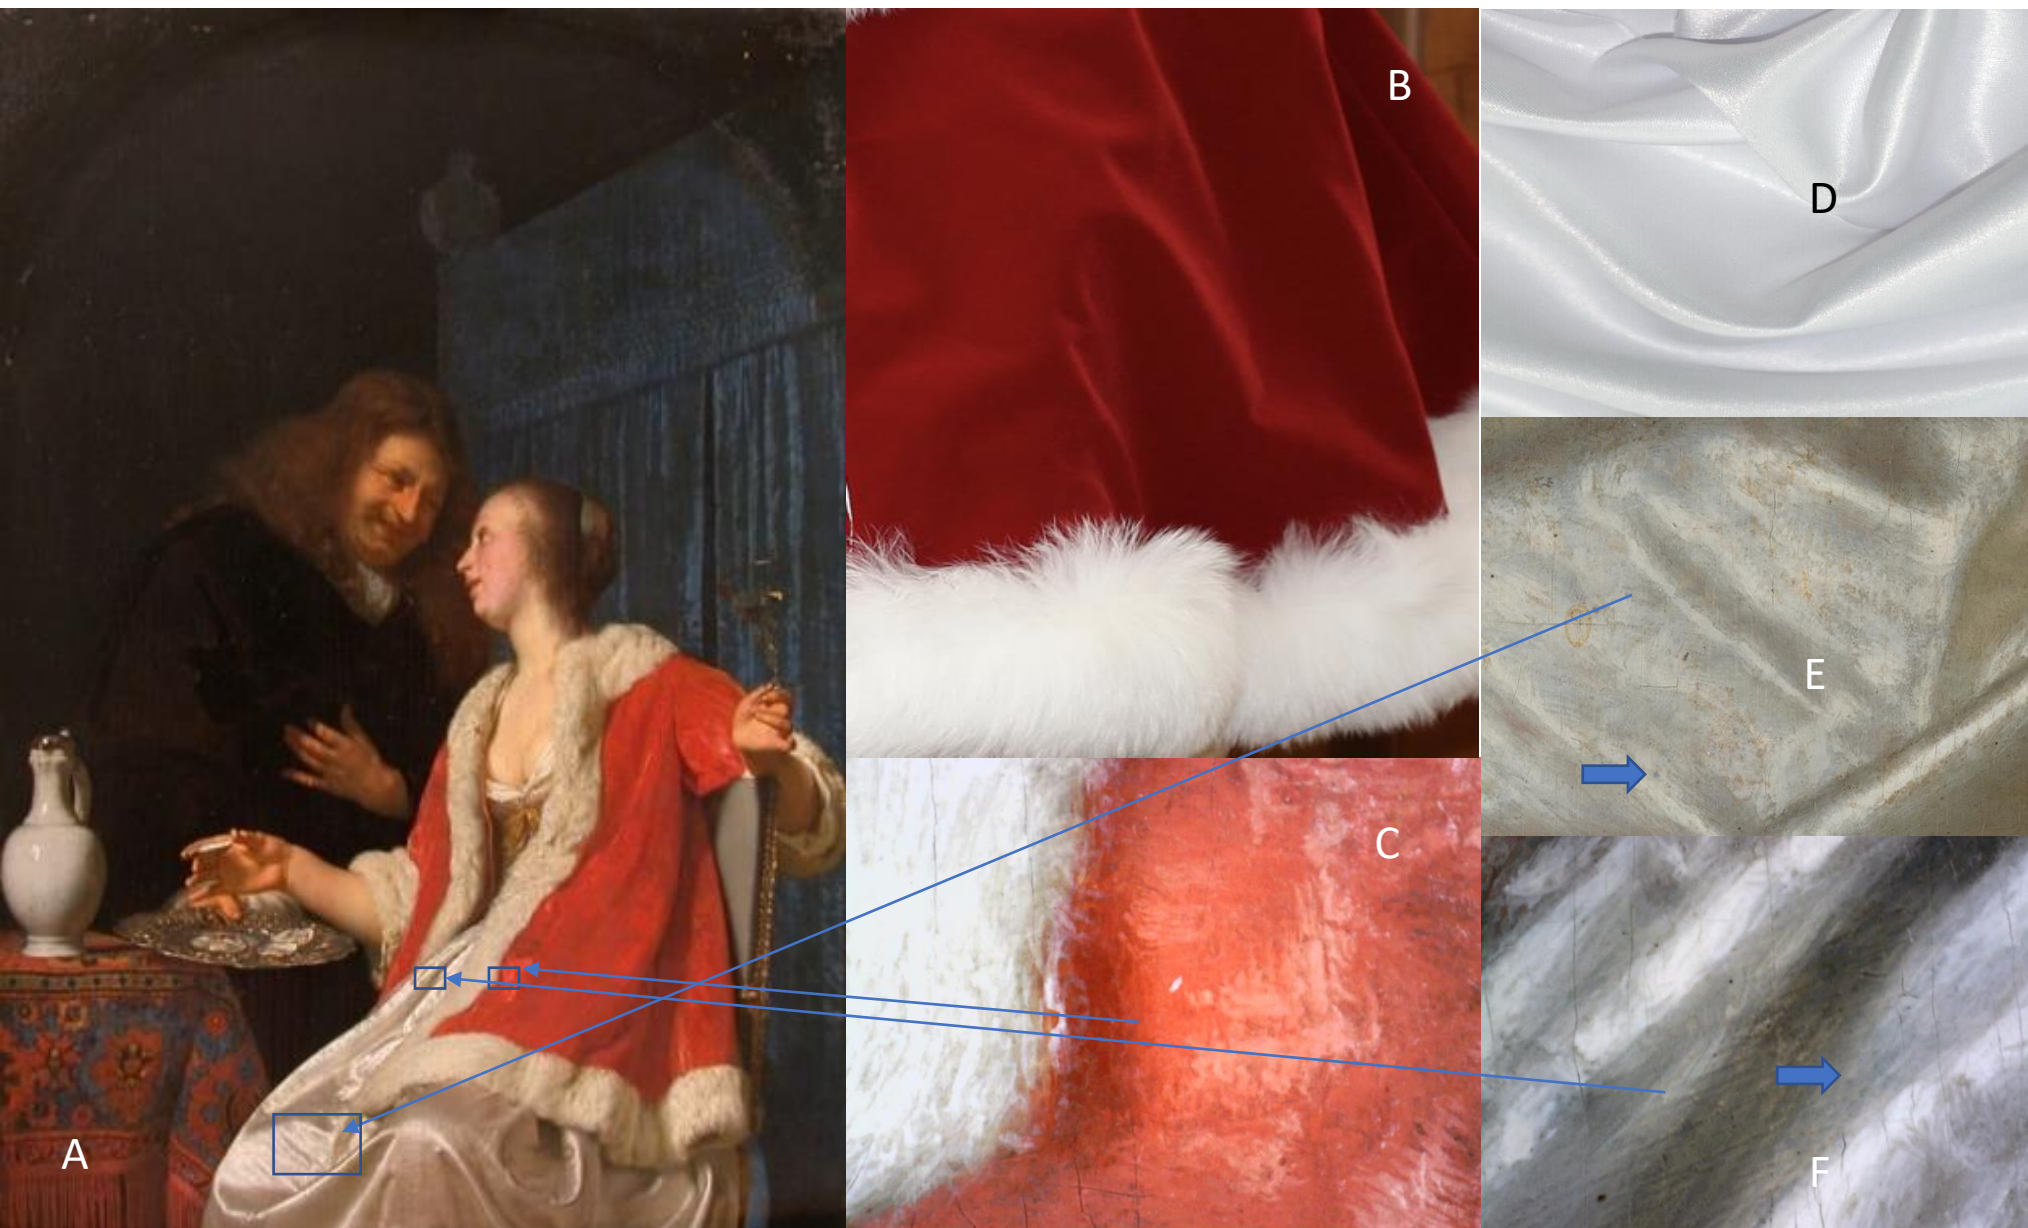

**Figure 1.** A) Frans van Mieris, *The Oyster Meal*, 1661, 27 × 20 cm, signed and date bottom right, Mauritshuis, The Hague. Photo Margaretha Svenson. B) Real velvet. (Internet). C) Detail of velvet, image taken with Zeiss microscope at 20× magnification. D) Detail of real satin (Internet). E) Detail of Satin dress. The blue arrow is a large particle of ultramarine. In the half tones on the right a mixture of black and ochre is visible. Image taken with Zeiss microscope at 8× magnification. F) Detail of Satin dress. The highlight has a cool ultramarine glaze. Image taken with Zeiss microscope at 20× magnification.

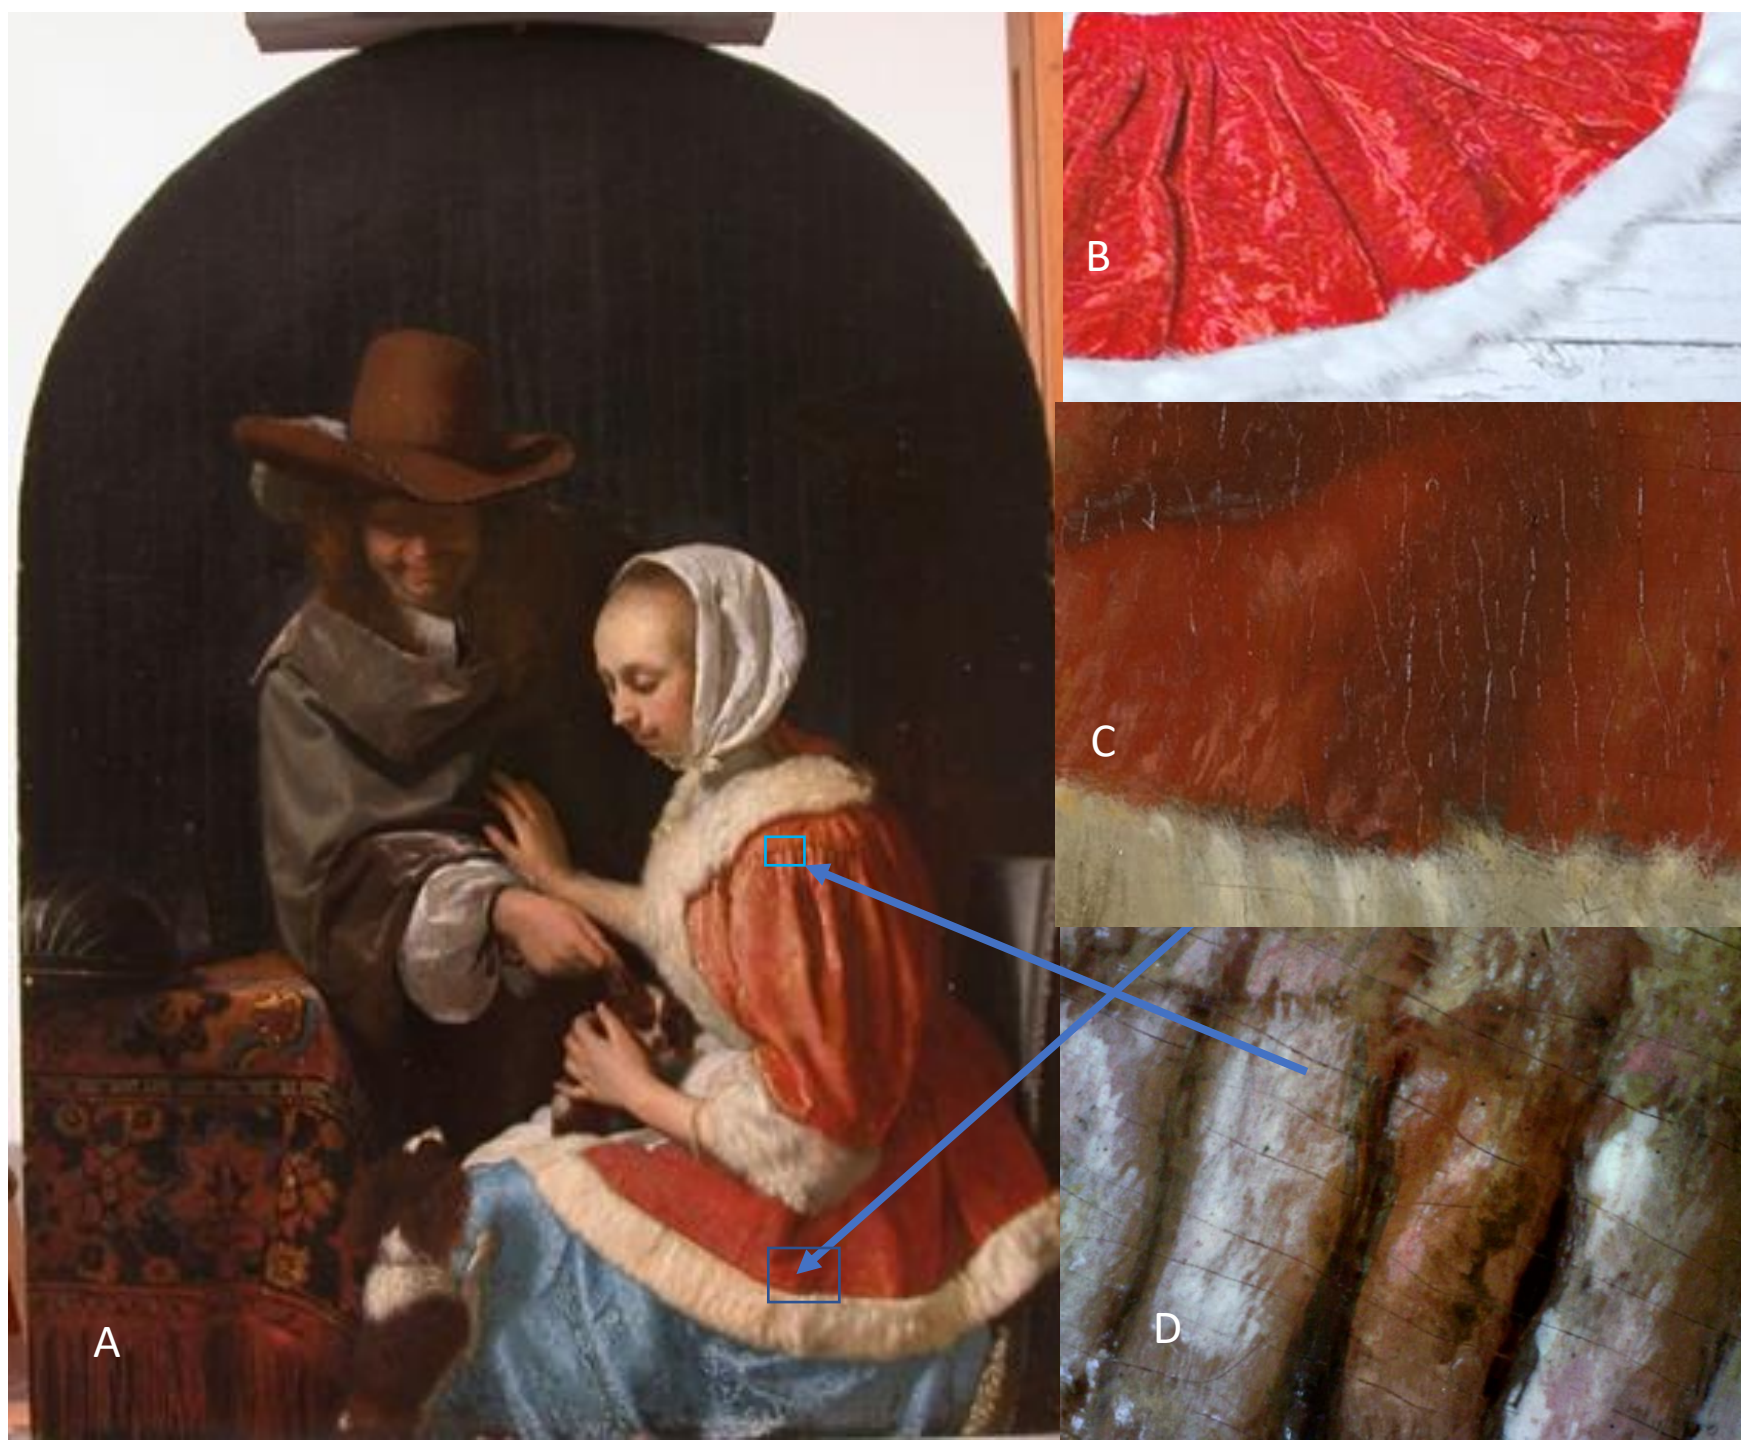

**Figure 2.** A) Frans van Mieris, *Man and Woman with Two Dogs*, 1660, panel, 27,5 × 20 cm, Mauritshuis, The Hague. Photo Margareta Svensson.

B) Real velvet, thinner kind.

C) Detail of fur and velvet. Ca. 5× magnification. Photo Margareta Svensson.

D) Detail of velvet highlights on sleeve. Image taken with Zeiss microscope at 20× magnification.

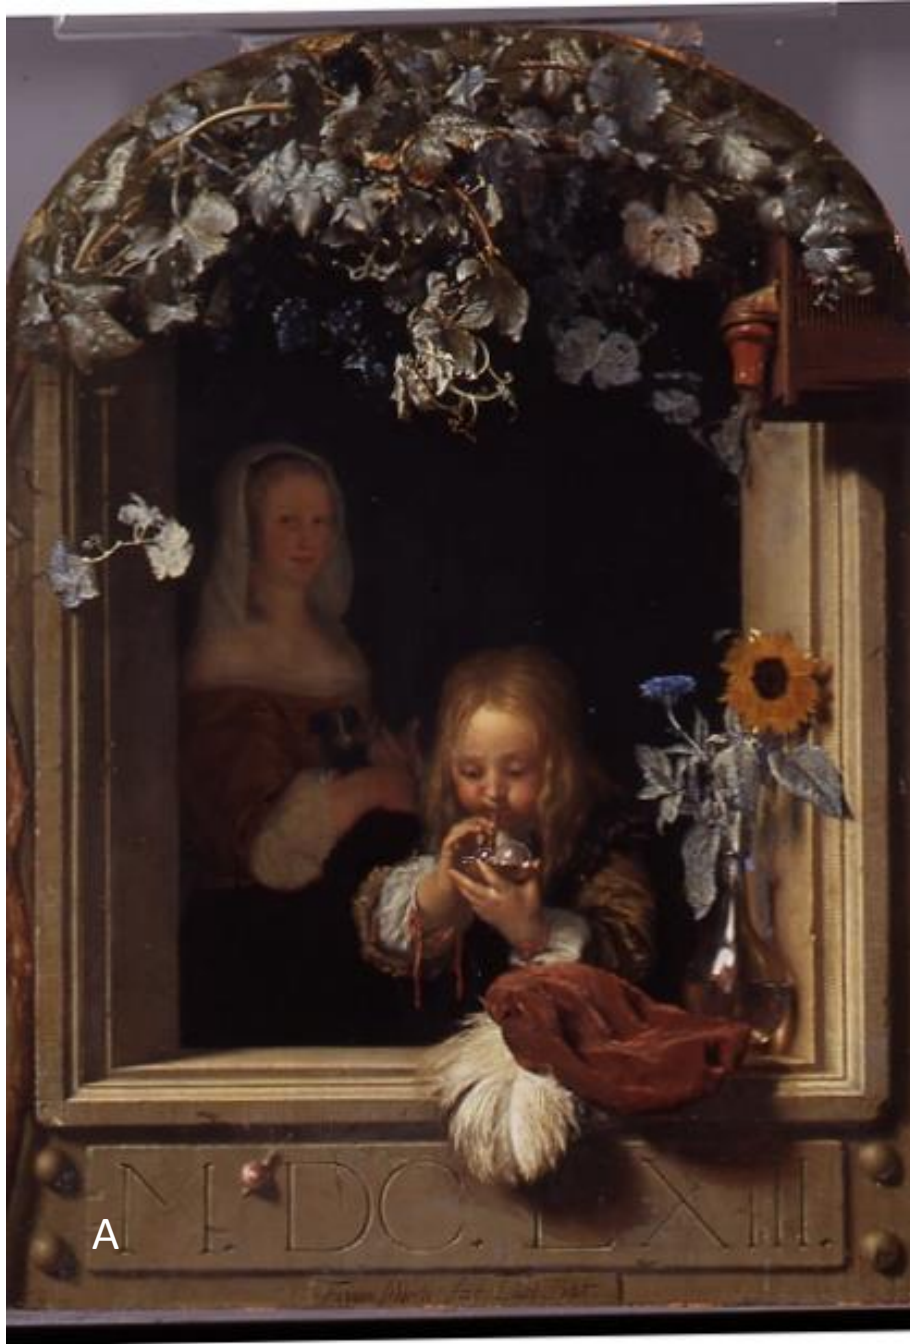

A

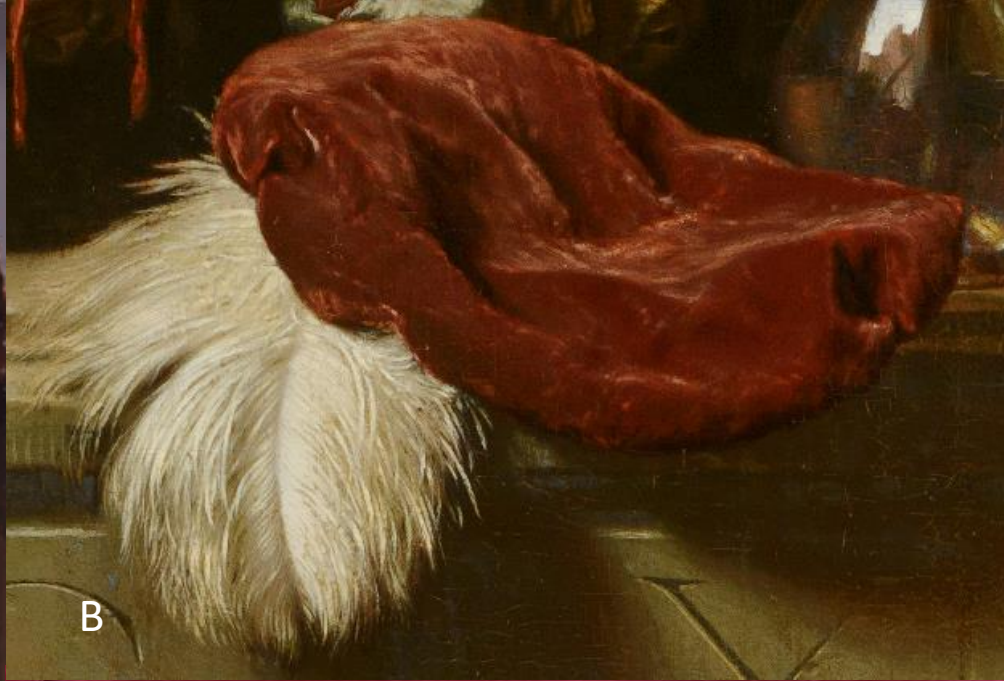

B

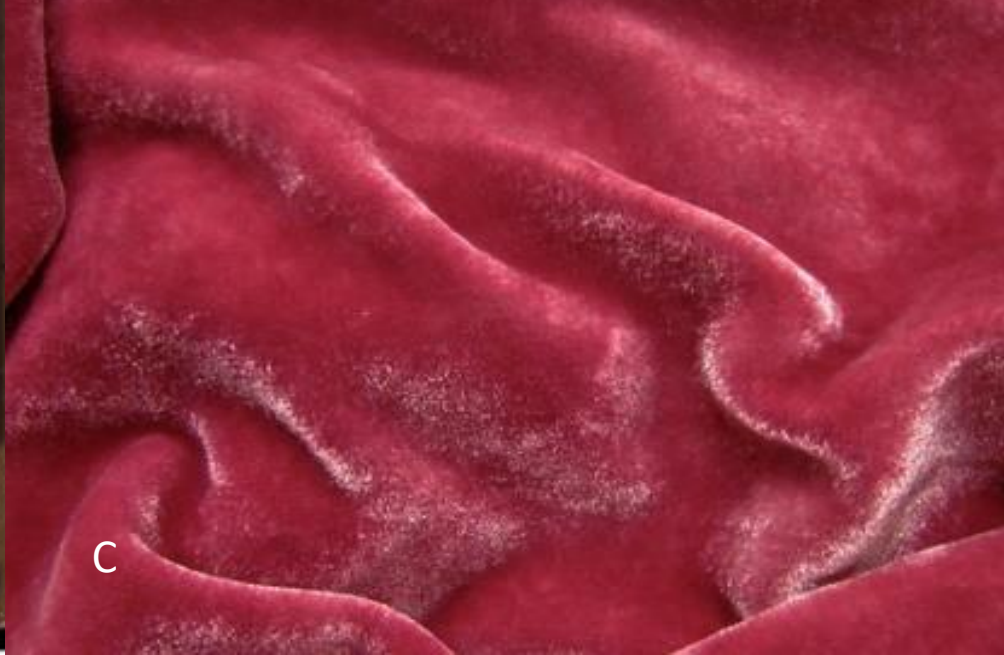

C

**Figure 3.** A) *Boy Blowing Bubbles*, 1663, 25,5 × 19 cm. Mauritshuis, The Hague. Photo Margareta Svensson. B) Detail of hat on windowsill. C) Real velvet. Photo A. Wallert.

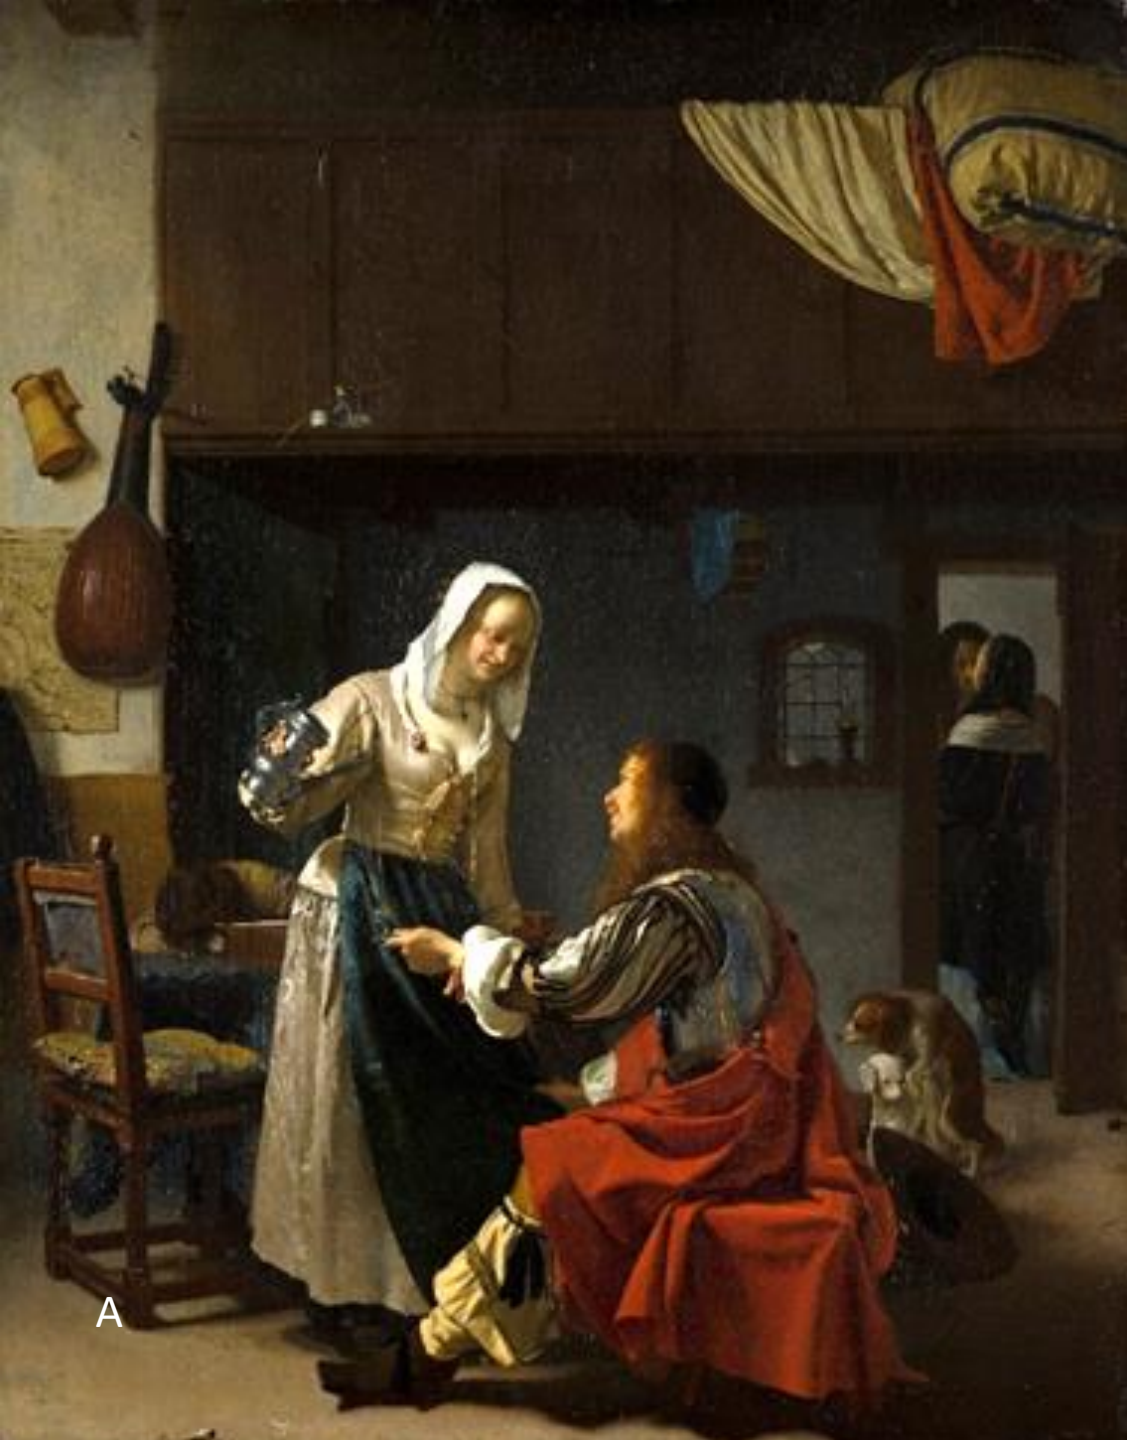

A

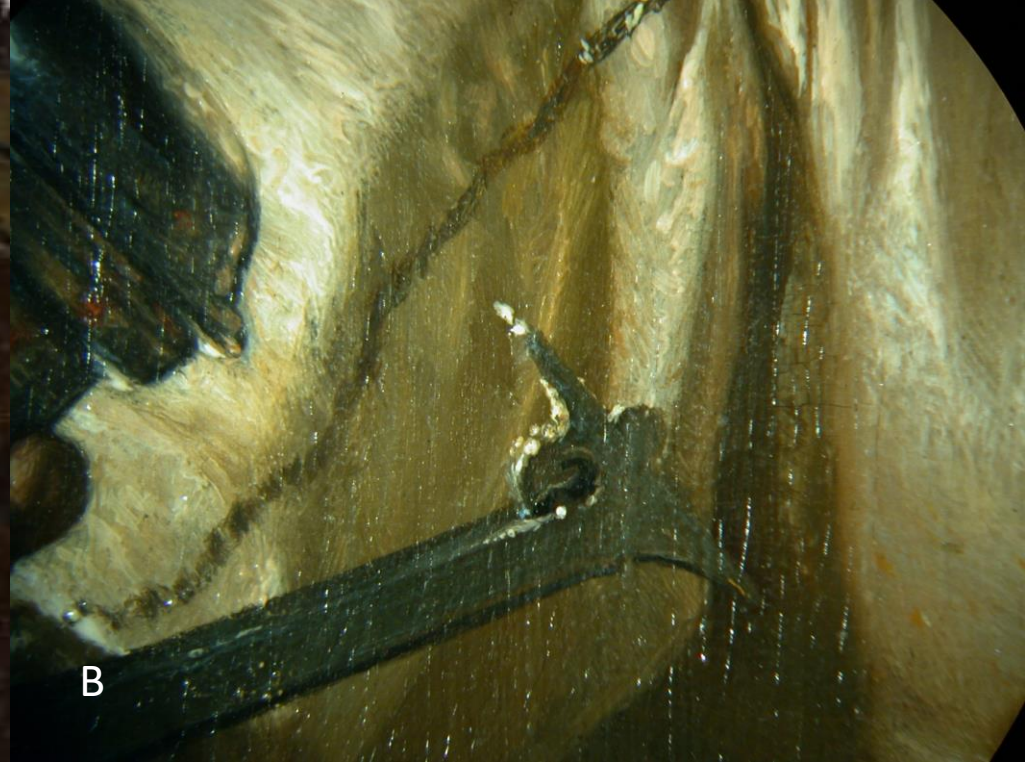

B

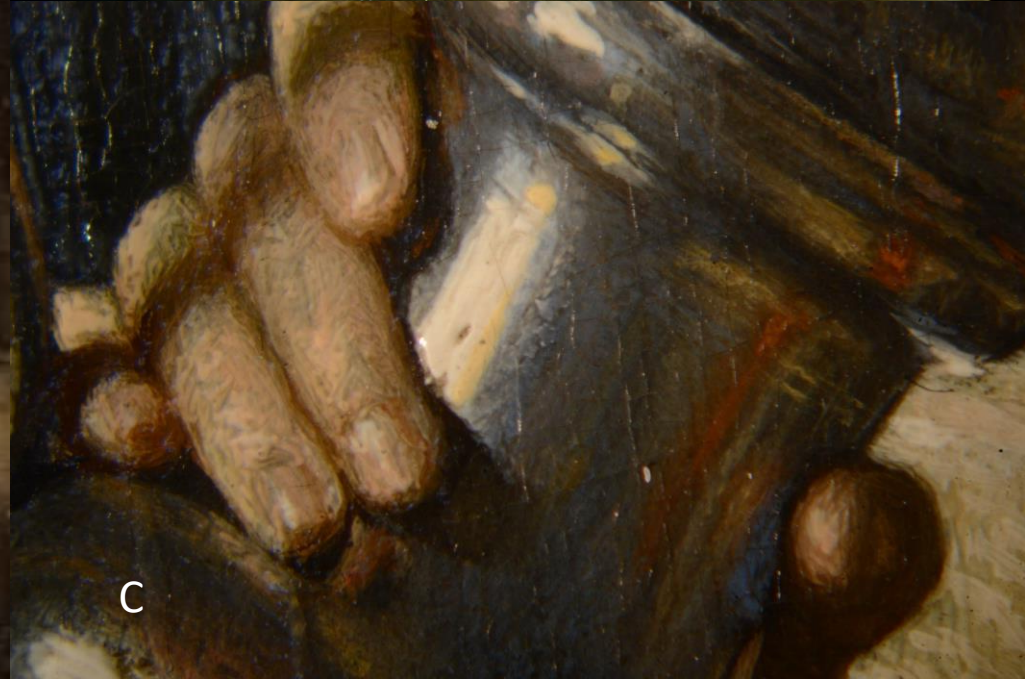

C

**Figure 4.** A) Frans van Mieris, *Brothel Scene*, c. 1658, 42,8 × 33,3 cm, Mauritshuis, The Hague. Photo Margaret Svensson.  
B) Detail of nozzle of jug showing specular reflections.  
C) Detail showing fingers and jug.
